# Supplementary material for: Mn-doped Co2(OH)3Cl xerogels with 3D interconnected mesoporous structures as lithium ion battery anodes with improved electrochemical performance
Source: Royal Society of Chemistry journal article supplement (doi:10.1039/c5ta03426d), 2015-01-01
Supplement: c5ta03426d1.pdf [file c5ta03426d1.pdf]

## Supporting Information

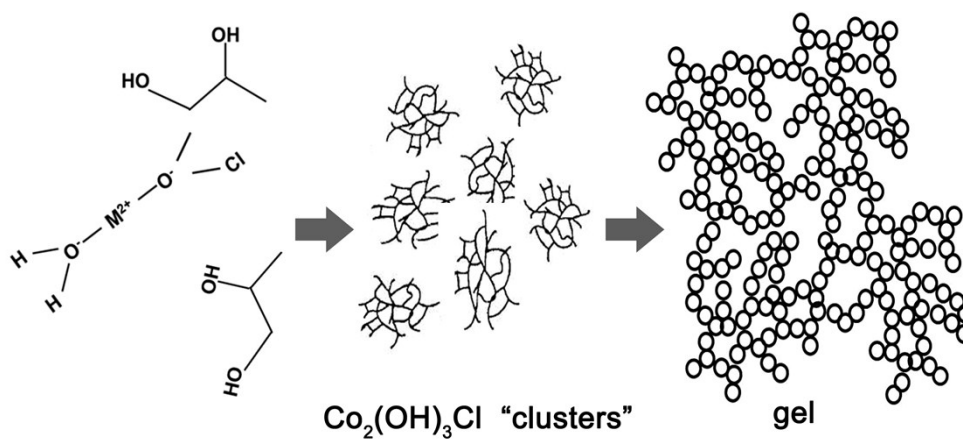

**Schema 1** Sol-gel forming process of  $\text{Co}_2(\text{OH})_3\text{Cl}$  xerogels.

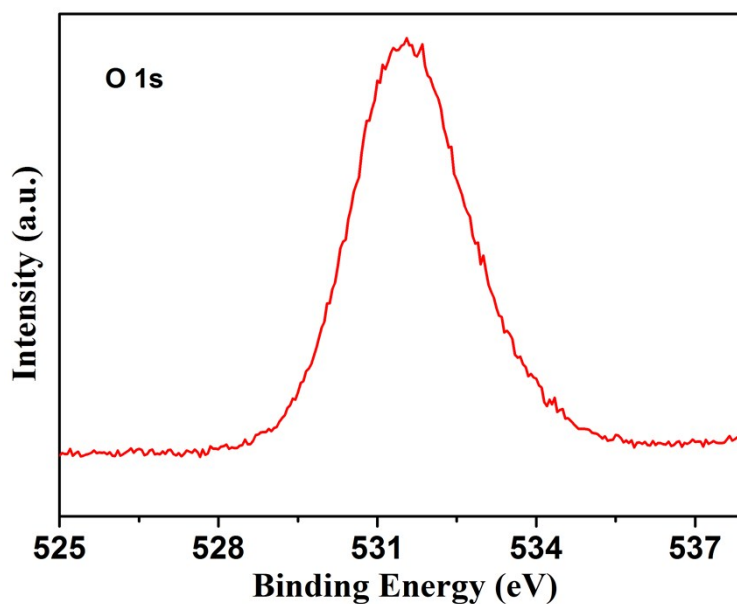

**Figure S1**  $\text{O } 1s$  energy spectrum of 4%Mn- $\text{Co}_2(\text{OH})_3\text{Cl}$  xerogel.

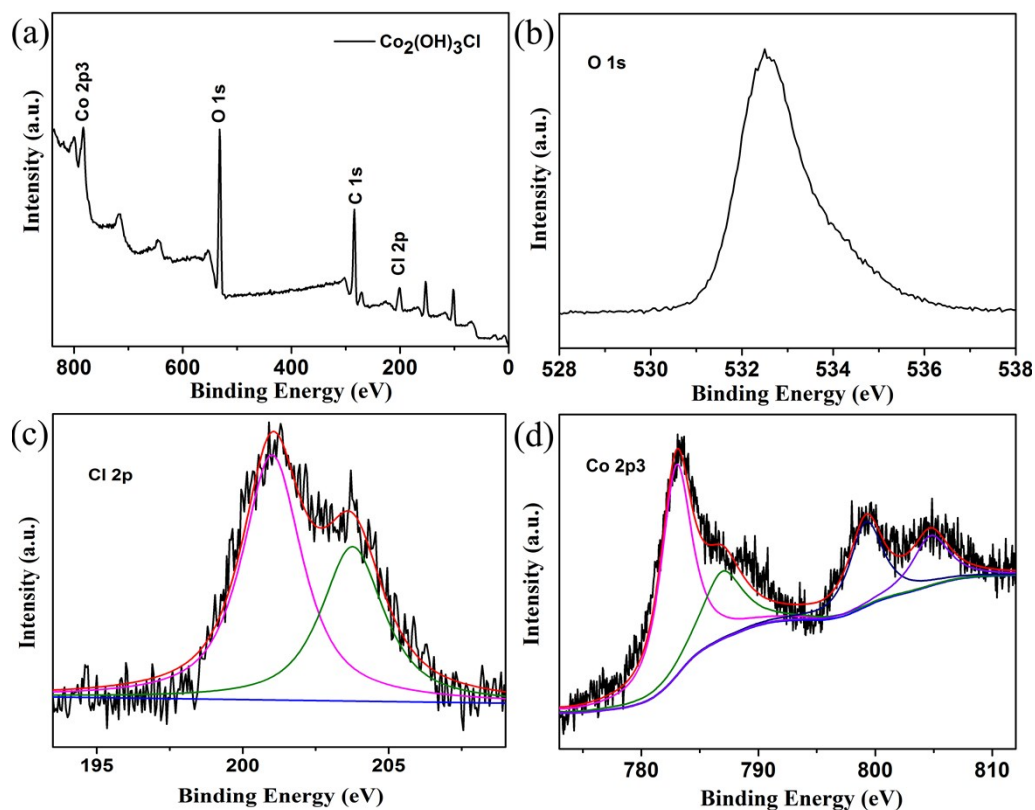

**Figure S2** XPS spectra of  $\text{Co}_2(\text{OH})_3\text{Cl}$  xerogel: a) survey spectrum, (b) O 1s, (c) Cl 2p, and (d) Co 2p energy spectrum.

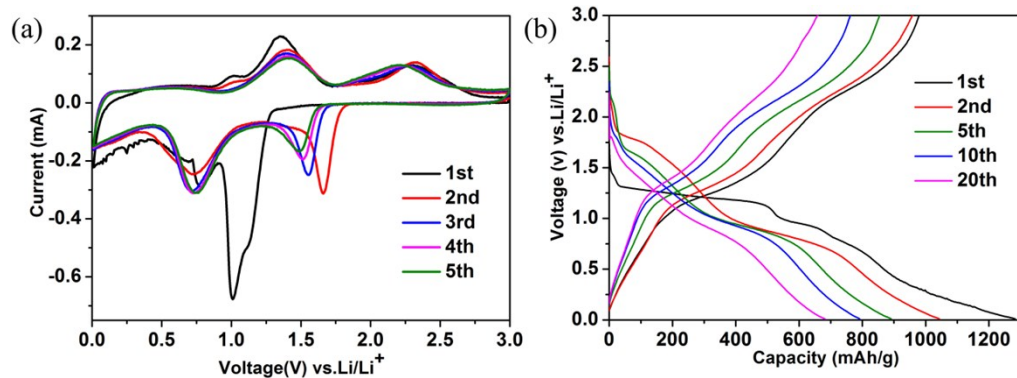

**Figure S3** (a) Cyclic voltammetric (CV) curves of the first five cycles in the potential range of 0–3 V at a scan rate of  $0.1 \text{ mV s}^{-1}$  and (b) the charge-discharge curves between 0.01 and 3.0 V at the current of  $100 \text{ mA g}^{-1}$  for pure  $\text{Co}_2(\text{OH})_3\text{Cl}$  xerogel.

**Table S1** Textural parameters of the Mn doped and undoped  $\text{Co}_2(\text{OH})_3\text{Cl}$ .

| sample     | BET surface area( $\text{m}^2\text{g}^{-1}$ ) | Pore diameter (nm) | Total pore volume( $\text{cm}^3\text{g}^{-1}$ ) |
|------------|-----------------------------------------------|--------------------|-------------------------------------------------|
| 0%Mn doped | 92.4                                          | 33.36              | 1.076                                           |
| 4%Mn doped | 117.32                                        | 33.64              | 1.197                                           |
| 8%Mn doped | 119.28                                        | 34.23              | 1.326                                           |

**Table S2** Comparison of the electrochemical properties of the present  $\text{Co}_2(\text{OH})_3\text{Cl}$ , Mn doped  $\text{Co}_2(\text{OH})_3\text{Cl}$  xerogel samples and previous pure  $\text{Co}_2(\text{OH})_3\text{Cl}$ ,  $\text{H}_3\text{NOHCl}$ ,  $\text{Co}(\text{OH})_2$  and  $\text{CoCl}_2$  materials.

| Materials                                 | Initial capacity ( $\text{mA h g}^{-1}$ ) | Capacity ( $\text{mA h g}^{-1}$ )           | Reference  |
|-------------------------------------------|-------------------------------------------|---------------------------------------------|------------|
| $\text{Co}_2(\text{OH})_3\text{Cl}$       | 1282.7 (100 $\text{mA g}^{-1}$ )          | 640 (100 $\text{mA g}^{-1}$ , 50 cycles)    | This paper |
| 4%Mn- $\text{Co}_2(\text{OH})_3\text{Cl}$ | 1965.9 (100 $\text{mA g}^{-1}$ )          | 1376.5 (100 $\text{mA g}^{-1}$ , 50 cycles) | This paper |
| $\text{Co}_2(\text{OH})_3\text{Cl}$       | 1719 (200 $\text{mA g}^{-1}$ )            | 407 (200 $\text{mA g}^{-1}$ , 50 cycles)    | 21         |
| $\text{H}_3\text{NOHCl}$                  | 2143.4 (50 $\text{mA g}^{-1}$ )           | 676.1(50 $\text{mA g}^{-1}$ , 30 cycles)    | 39         |
| $\text{Co}(\text{OH})_2$                  | 1558 (200 $\text{mA g}^{-1}$ )            | 400 (200 $\text{mA g}^{-1}$ , 30 cycles)    | 14         |
| $\text{Co}(\text{OH})_2$                  | 909 (58 $\text{mA g}^{-1}$ )              | 63 (58 $\text{mA g}^{-1}$ , 50 cycles)      | 51         |
| $\text{CoCl}_2$                           | 780 (1 C)                                 | 375 (1 C, 50 cycles) (1C =407.5)            | 17         |

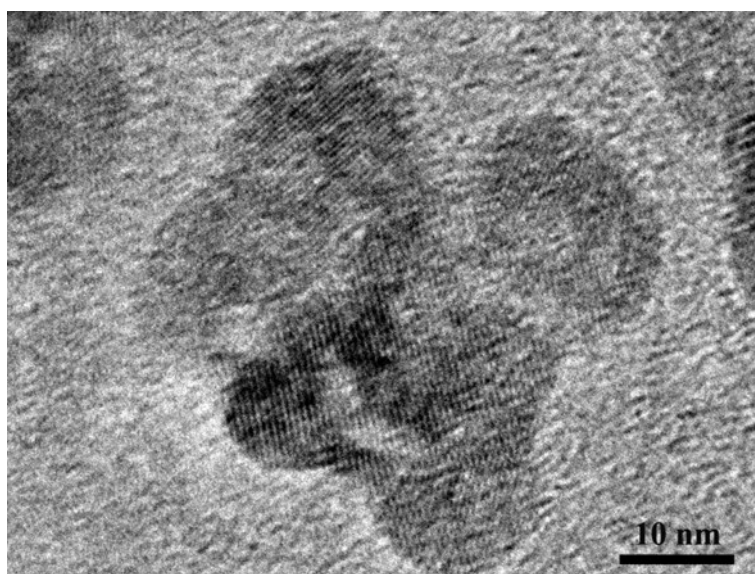

Figure S3. The TEM image of 0% Mn doped  $\text{Co}(\text{OH})_2\text{Cl}_3$ .

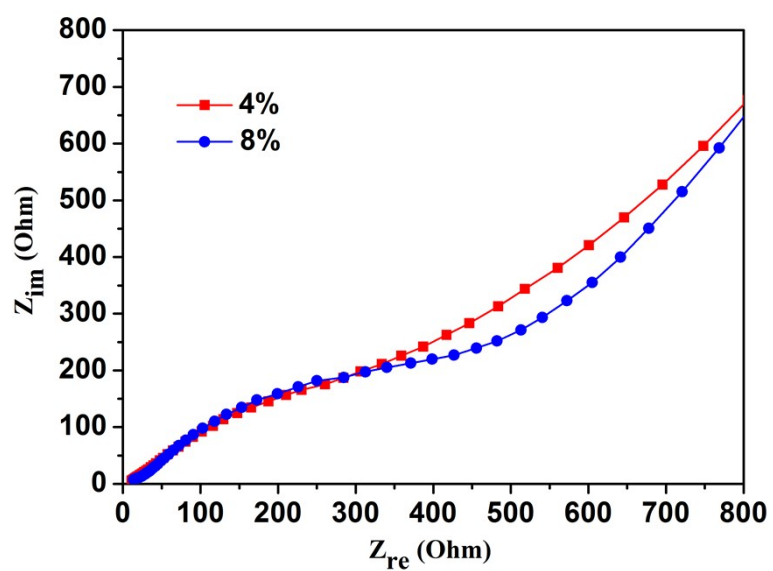

Figure S4 EIS spectra of 4% and 8% Mn- $\text{Co}_2(\text{OH})_3\text{Cl}$  samples after 30 cycles at a current density of  $500 \text{ mA g}^{-1}$ .

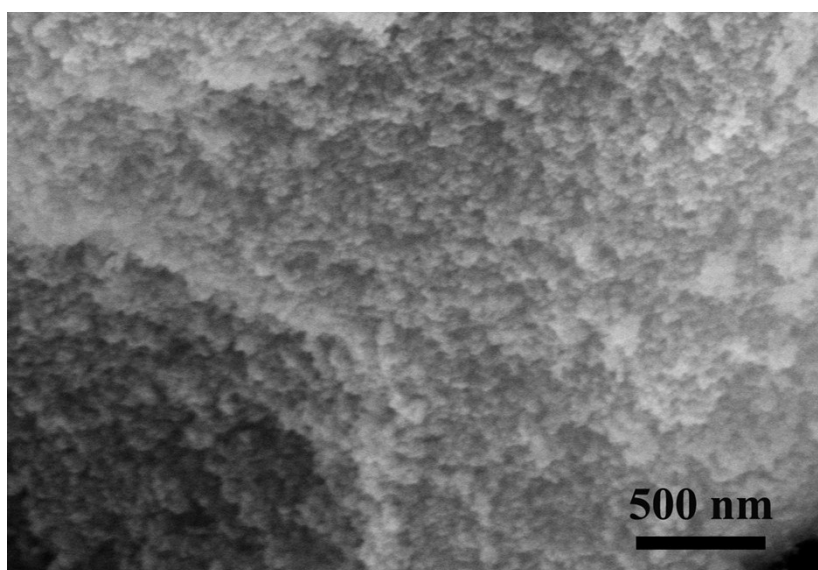

**Figure S5** SEM image of Mn doped Co<sub>2</sub>(OH)<sub>3</sub>Cl xerogels.
